# Supplementary material
Source: PubMed Central journal article supplement (PMC3480330)
Supplement: NIHMS411178-supplement-Supplement_PDF.pdf [file NIHMS411178-supplement-Supplement_PDF.pdf]

5'ATGACACCTCAAATATTACTGATTTGTGTGCAGAATACCACAACACACAAATACATACGCT  
AAATGATAAGATATTTTCGTATACAGAATCTCTAGCTGGAAAAAGAGAGATGGCTATCATTAC  
TTTTAAGAATGGTGCAACTTTTCAAGTAGAAGTACCAGGTAGTCAACATATAGATTCACAAAA  
AAAAGCAATTGAAAGGATGAAGGATACCCTGAGGATTGCATATCTTACTGAAGCTAAAGTCG  
AAAAGTTATGTGTATGGAATAATAAACGCCTCATGCGATTGCCGCAATTAGTATGGCAAAT  
GGGCCCGGGCCCGTCGTAAACGTTTTGTGAACCAACACCTGTGCGGCTCACACCTGGTGGAA  
GCTCTACCTAGTGTGCGGGGAACGAGGCTTCTTCTACACACCCAAGACCCGCCGGAAACGT  
GAGGACCTGCAGGTGGGGCAGGTGGAGCTGGGCGGGGGCCCTGGTGCAGGCAGCCTGCAG  
CCCTTGGCCCTGGAGGGGTCCCGTCGTAAGCGTGGCATTGTGGAACAATGCTGTACCAGCATC  
TGCTCCCTCTACCAGCTGGAGAACTACTGCAACTAA3'

**Supplemental Figure 1.** DNA sequence of 5'-3' strand of CTB-Proinsulin containing three furin cleavage sites gene. Start and stop codons are represented in orange. CTB sequence is represented in blue. GPGP hinge is represented in green. Furin cleavage sites are represented in red. Insulin B, C, and A chains are represented in purple reading from left to right, respectively.
